# Supplementary material for: A reaction of [2,6-(tBu2PO)2C6H3]NiSCH2Ph with BH3·THF: borane mediated C–S bond cleavage
Source: Royal Society of Chemistry journal article supplement (doi:10.1039/c7dt04883a), 2018-01-01
Supplement: c7dt04883a1.pdf [file c7dt04883a1.pdf]

Electronic Supplementary Information for:

**Reaction of [2,6-(<sup>t</sup>Bu<sub>2</sub>PO)<sub>2</sub>C<sub>6</sub>H<sub>3</sub>]NiSCH<sub>2</sub>Ph with BH<sub>3</sub>·THF: borane mediated C–S  
bond cleavage**

Jie Zhang,\* Ting Liu, Qiang-Qiang Ma, Shujun Li and Xuenian Chen\*

*School of Chemistry and Chemical Engineering, Henan Key Laboratory of Boron Chemistry and  
Advanced Energy Materials, Henan Normal University, Xinxiang, Henan 453007, China*

*E-mails: jie.zhang@htu.edu.cn (J.Z.); xnchen@htu.edu.cn (X.C.)*

|                                                                                                                                         |     |
|-----------------------------------------------------------------------------------------------------------------------------------------|-----|
| Fig. S1-S4: <sup>1</sup> H, <sup>13</sup> C{ <sup>1</sup> H} and <sup>31</sup> P{ <sup>1</sup> H} NMR spectra of complex <b>5</b> ..... | 1-2 |
| Fig. S5-S6: <sup>1</sup> H NMR spectra of the NMR tube reaction of <b>1</b> with 2 equiv. of BH <sub>3</sub> ·THF.....                  | 3   |
| Fig. S7: <sup>31</sup> P{ <sup>1</sup> H} NMR spectra of the reaction of <b>1</b> with 2 equiv. of BH <sub>3</sub> ·THF.....            | 4   |
| Fig. S8-S9: <sup>31</sup> P{ <sup>1</sup> H} NMR spectra of the reaction of <b>1</b> with 1 equiv. of BH <sub>3</sub> ·THF.....         | 4-5 |
| Fig. S10-S12: <sup>1</sup> H, <sup>13</sup> C{ <sup>1</sup> H} and <sup>11</sup> B NMR spectra of compound <b>7</b> .....               | 5-6 |
| Fig. S13: IR spectra of complex <b>5</b> .....                                                                                          | 7   |

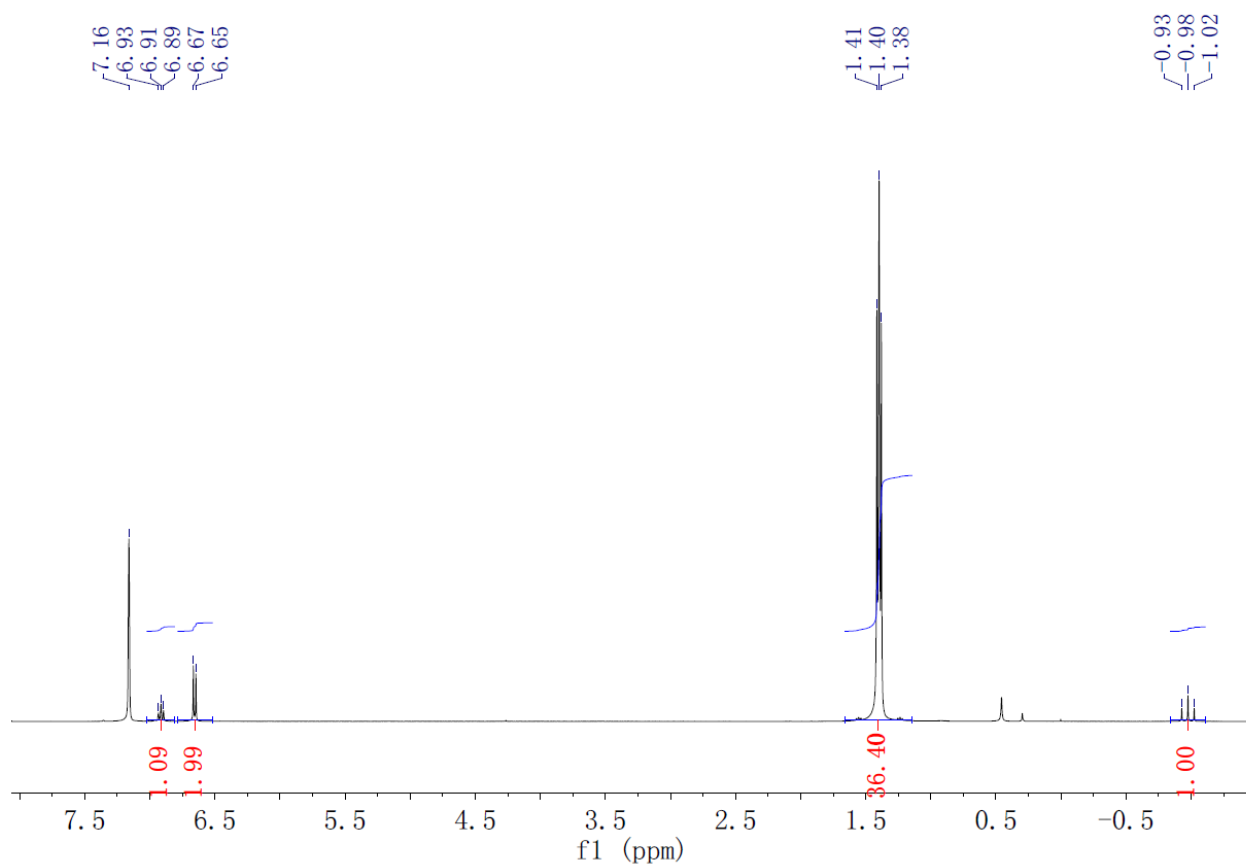

**Fig. S1** <sup>1</sup>H NMR spectrum of complex **5** (400 MHz, benzene-*d*<sub>6</sub>)

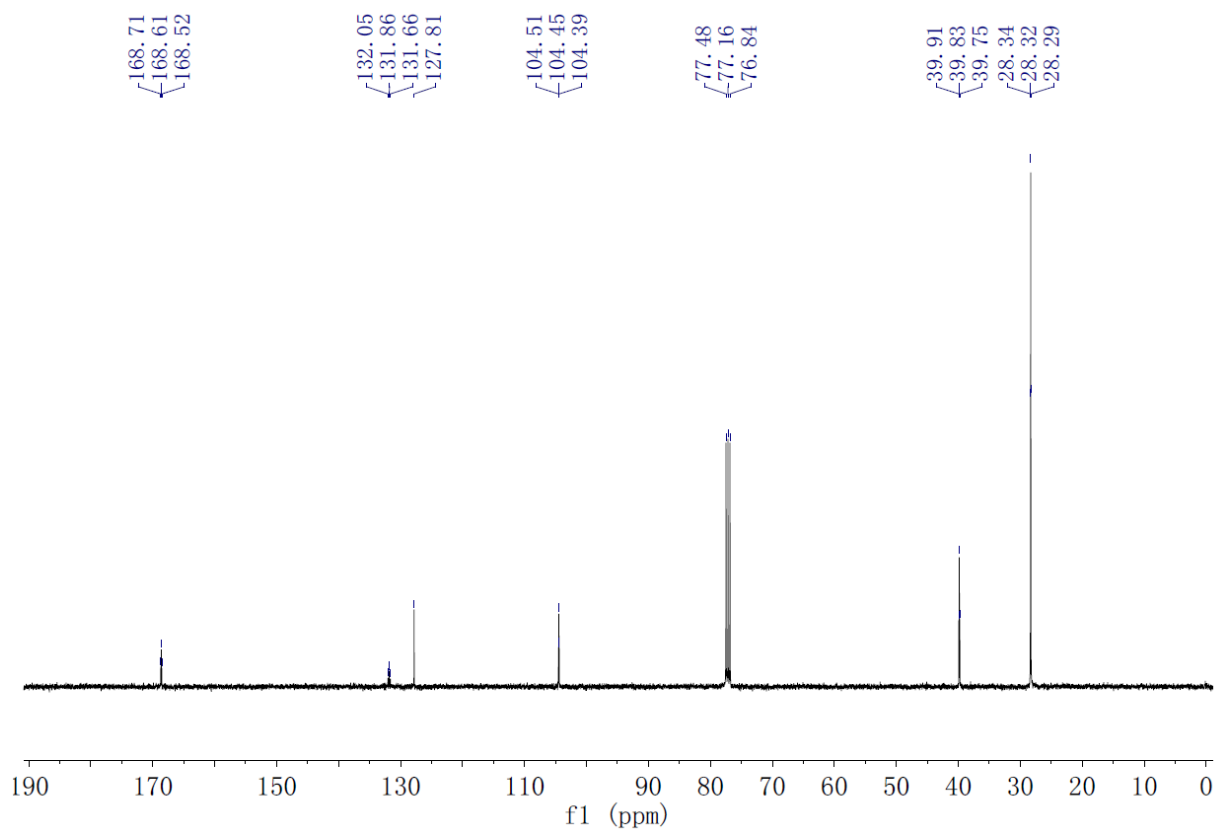

**Fig. S2** <sup>13</sup>C{<sup>1</sup>H} NMR spectrum of complex **5** (101 MHz, CDCl<sub>3</sub>)

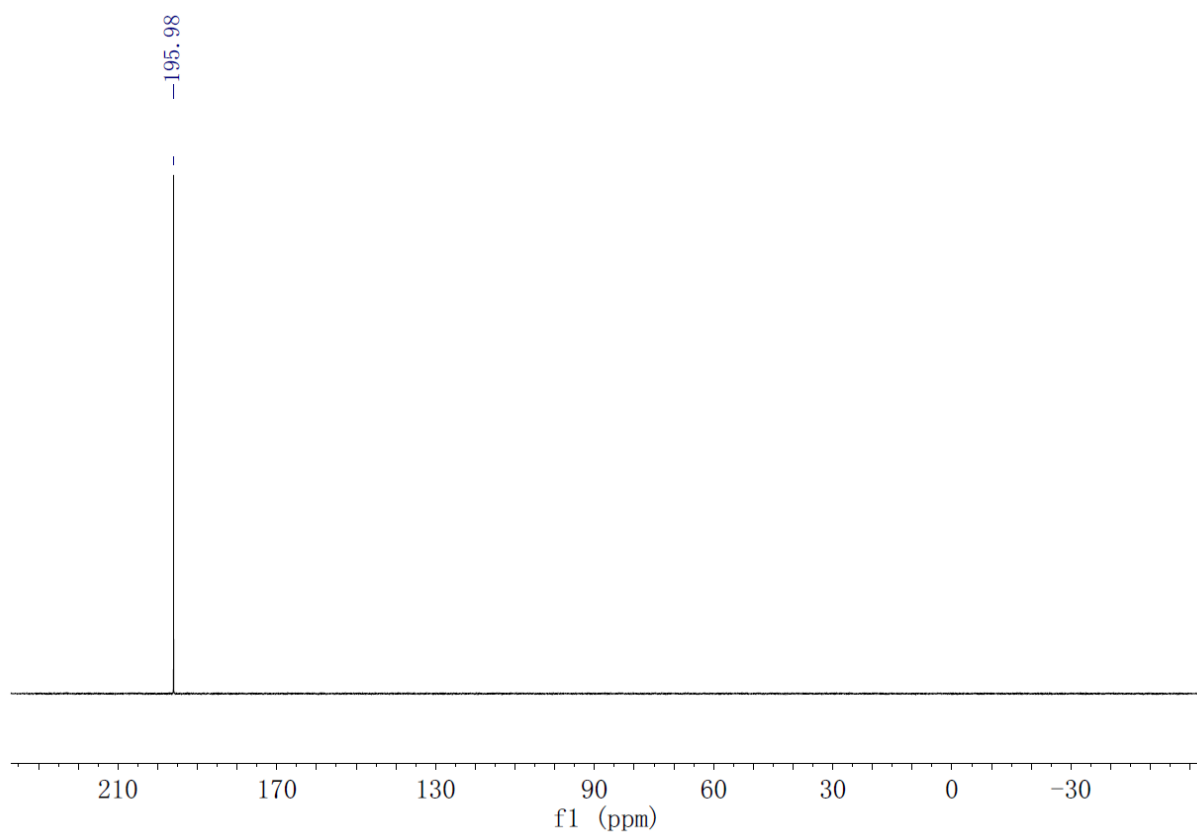

**Fig. S3**  $^{31}\text{P}\{^1\text{H}\}$  NMR spectrum of complex **5** (162 MHz, benzene- $d_6$ )

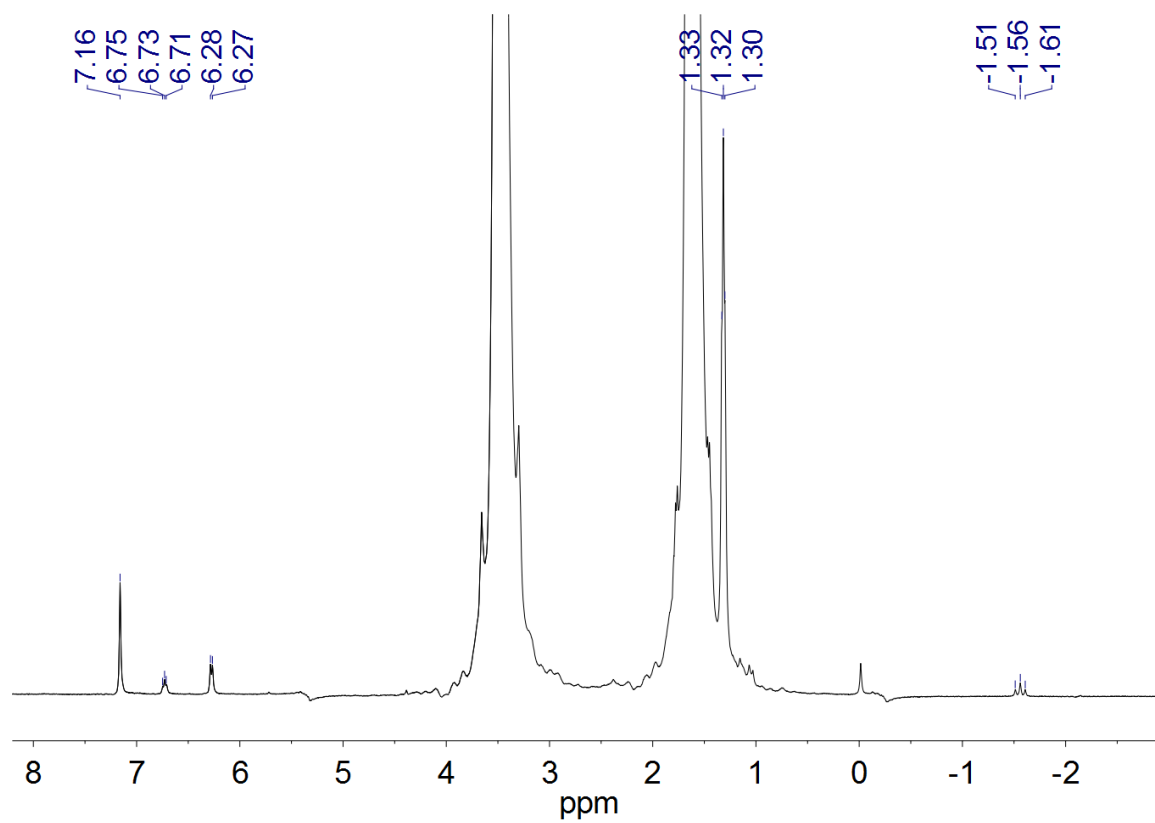

**Fig. S4**  $^1\text{H}$  NMR spectrum of complex **5** (400 MHz, THF/benzene- $d_6$  (1:1))

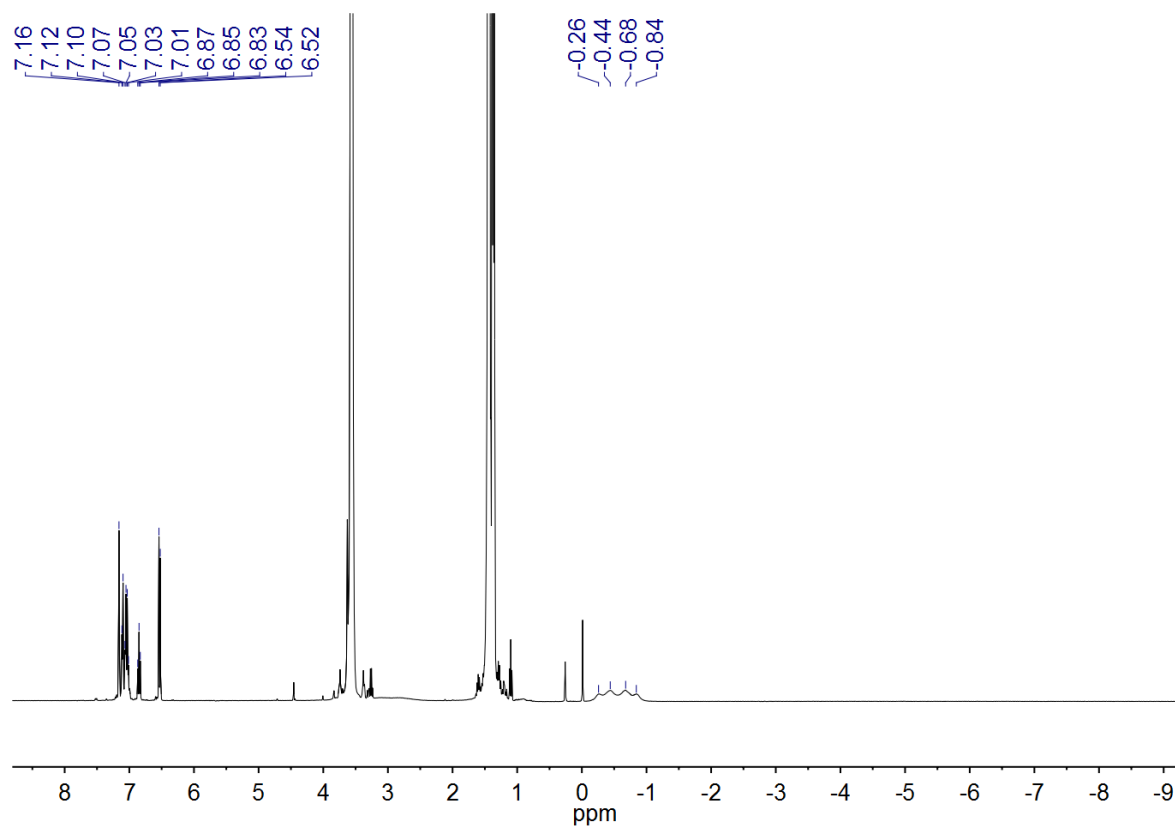

**Fig. S5**  $^1\text{H}$  NMR spectrum of the NMR tube reaction of **1** with 2 equiv. of  $\text{BH}_3 \cdot \text{THF}$  recorded 1 h after mixing the two reactants (400 MHz,  $\text{THF}/\text{benzene-}d_6$  (1:1))

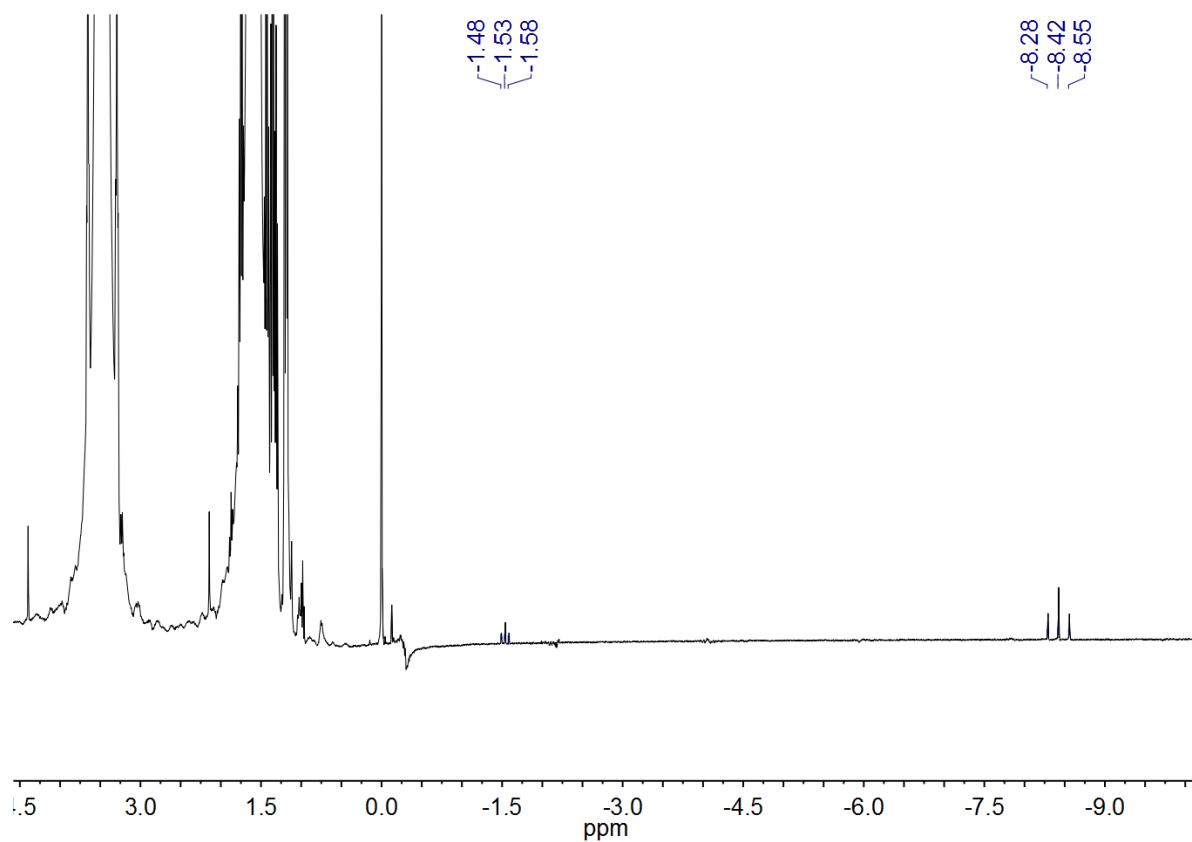

**Fig. S6**  $^1\text{H}$  NMR spectrum of the NMR tube reaction of **1** with 2 equiv. of  $\text{BH}_3 \cdot \text{THF}$  recorded 72 h after mixing the two reactants (400 MHz,  $\text{THF}/\text{benzene-}d_6$  (1:1))

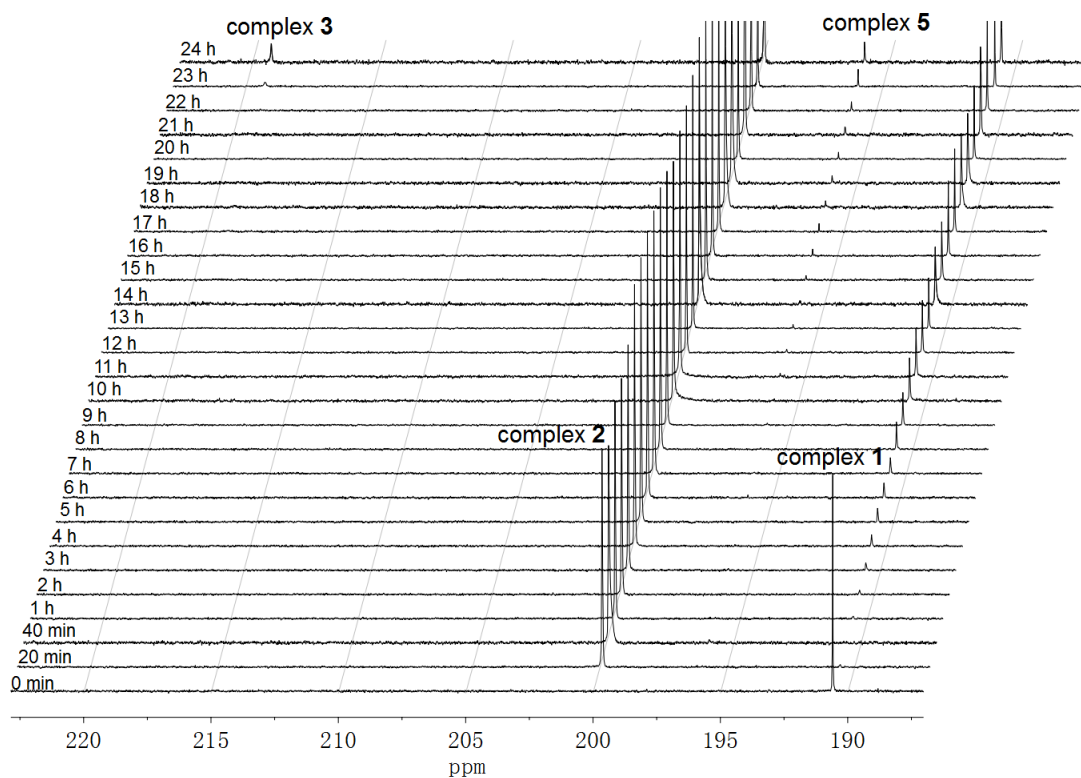

**Fig. S7**  $^{31}\text{P}\{^1\text{H}\}$  NMR spectra of the reaction of **1** with 2 equiv. of  $\text{BH}_3 \cdot \text{THF}$  in  $\text{THF}/\text{benzene-}d_6$  (1:1) at room temperature.

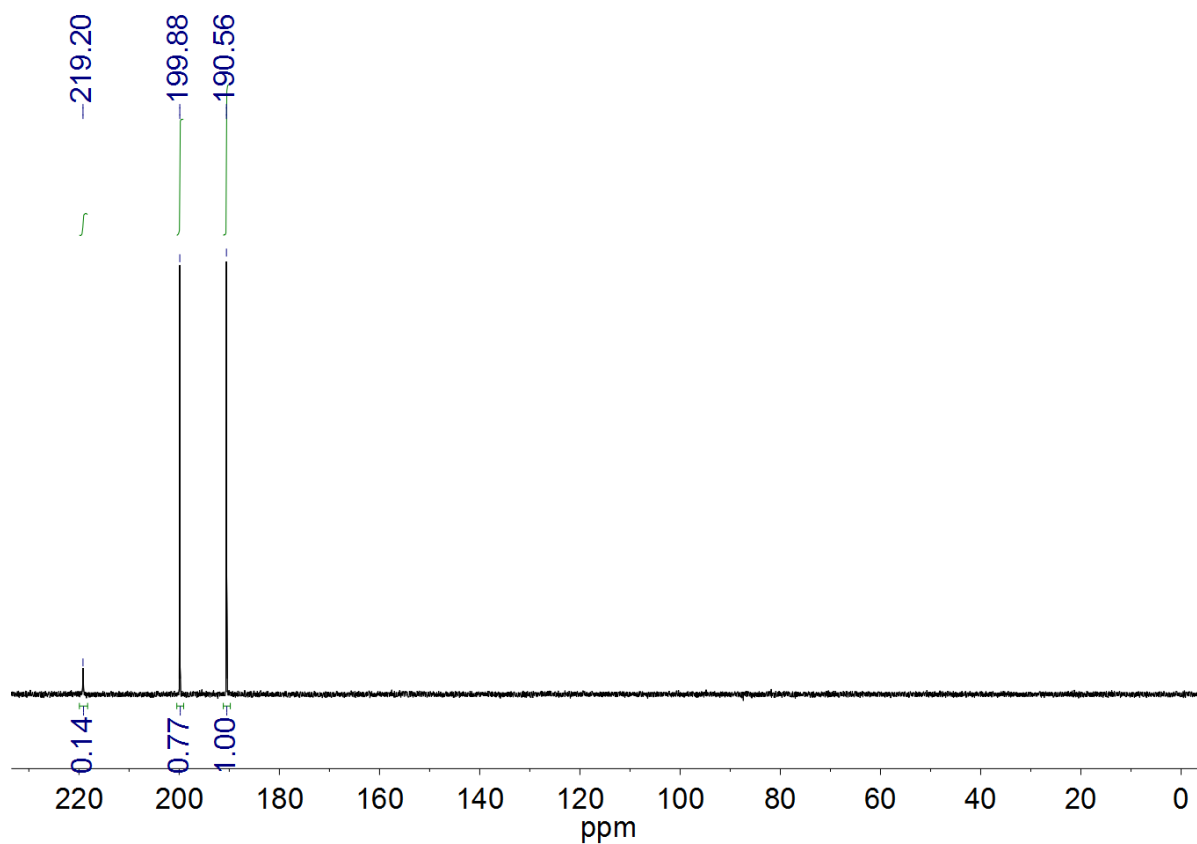

**Fig. S8**  $^{31}\text{P}\{^1\text{H}\}$  NMR spectrum of the reaction of **1** with 1 equiv. of  $\text{BH}_3 \cdot \text{THF}$  recorded 10 min after mixing the two reactants (room temperature,  $\text{THF}/\text{benzene-}d_6$  (1:1)).

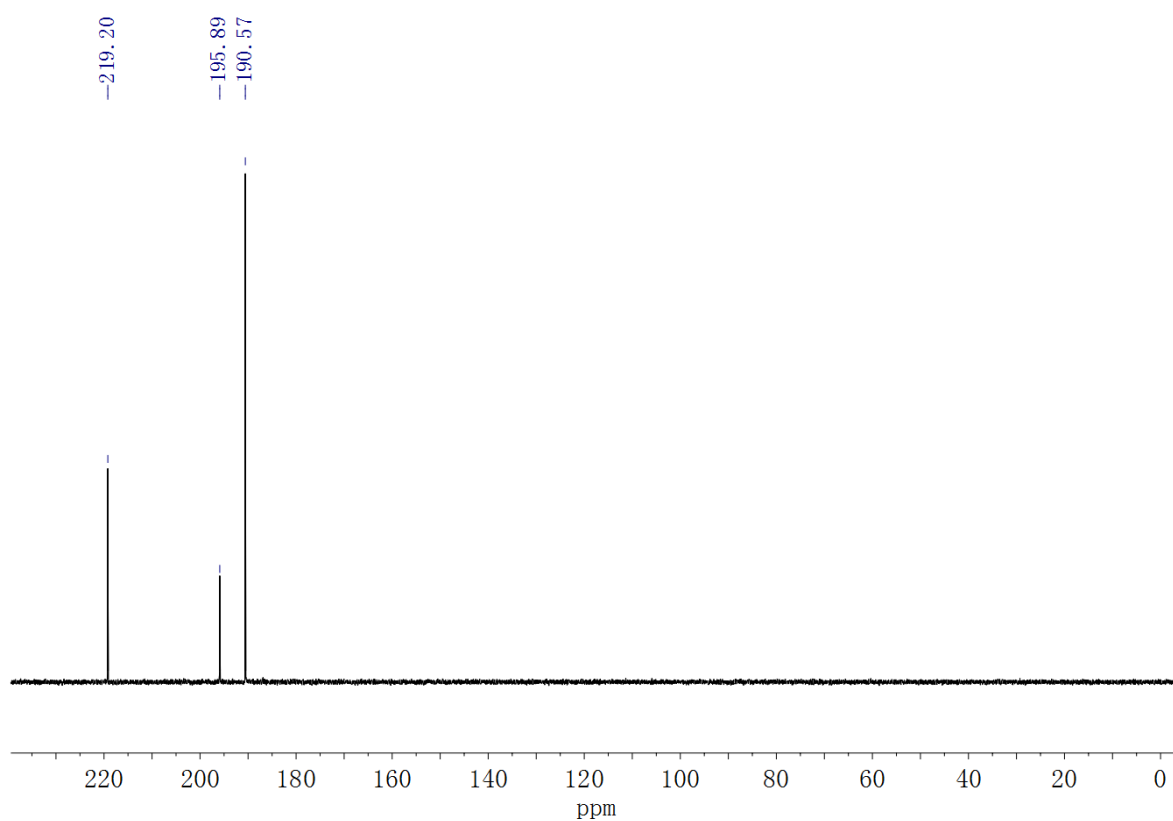

**Fig. S9**  $^{31}\text{P}\{^1\text{H}\}$  NMR spectrum of the reaction of **1** with 1 equiv. of  $\text{BH}_3 \cdot \text{THF}$  recorded 76 h after mixing the two reactants (room temperature,  $\text{THF}/\text{benzene-}d_6$  (1:1)).

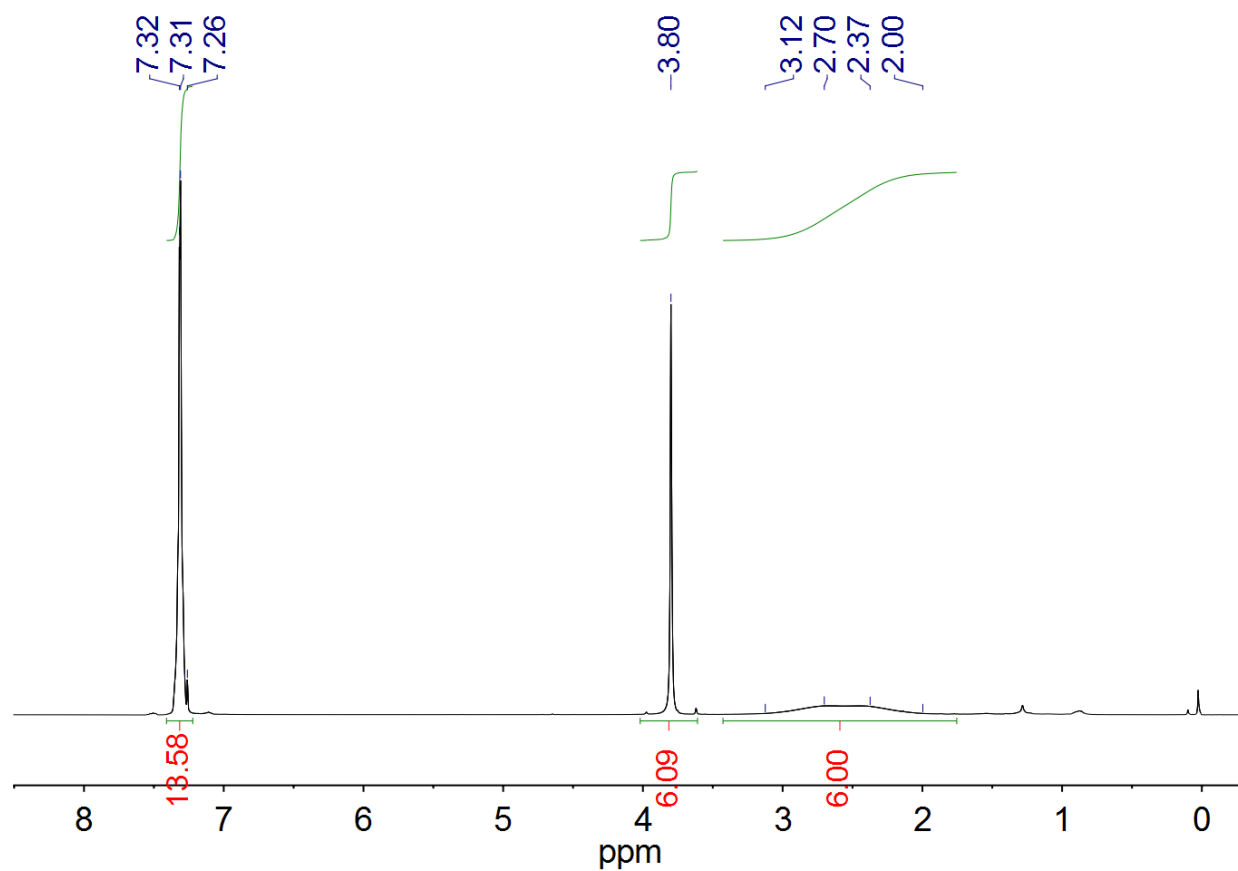

**Fig. S10**  $^1\text{H}$  NMR spectrum of compound **7** (400 MHz,  $\text{CDCl}_3$ )

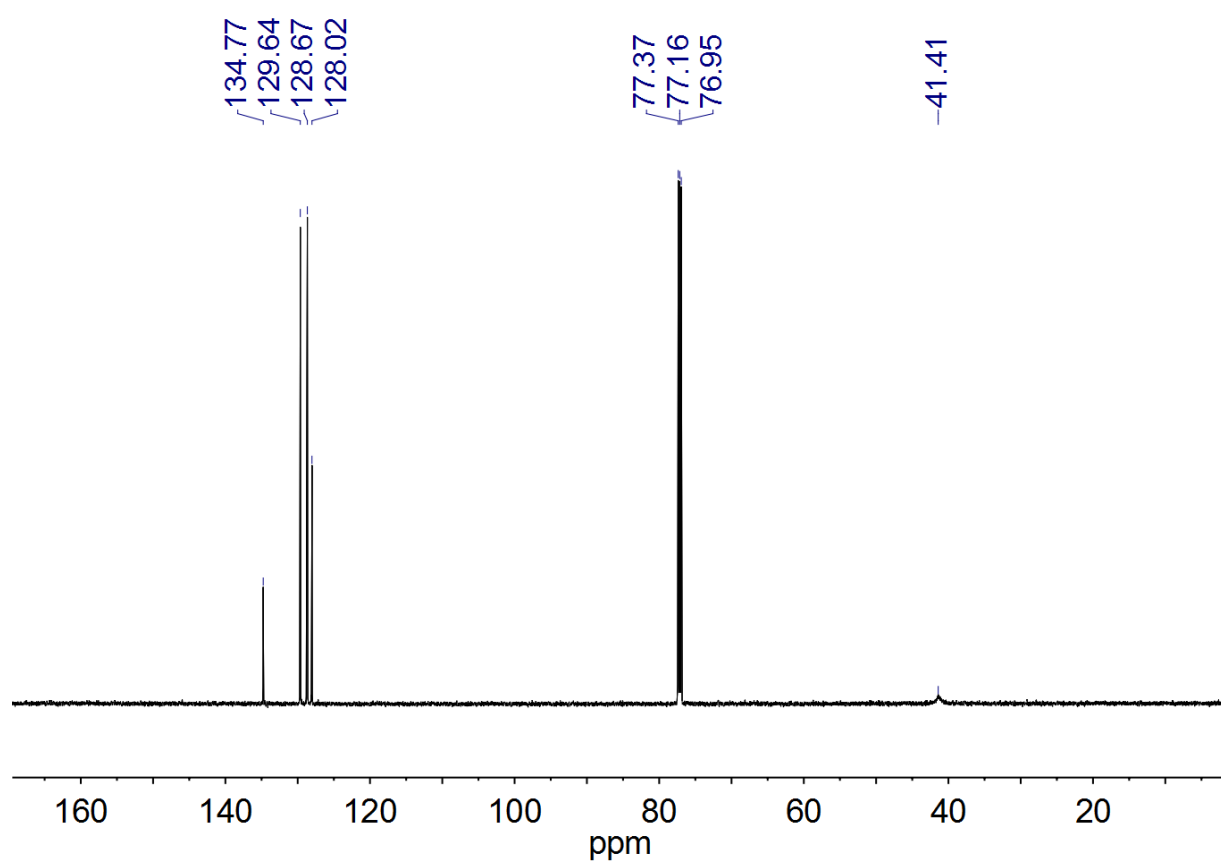

**Fig. S11**  $^{13}\text{C}\{^1\text{H}\}$  NMR spectrum of compound **7** (101 MHz,  $\text{CDCl}_3$ )

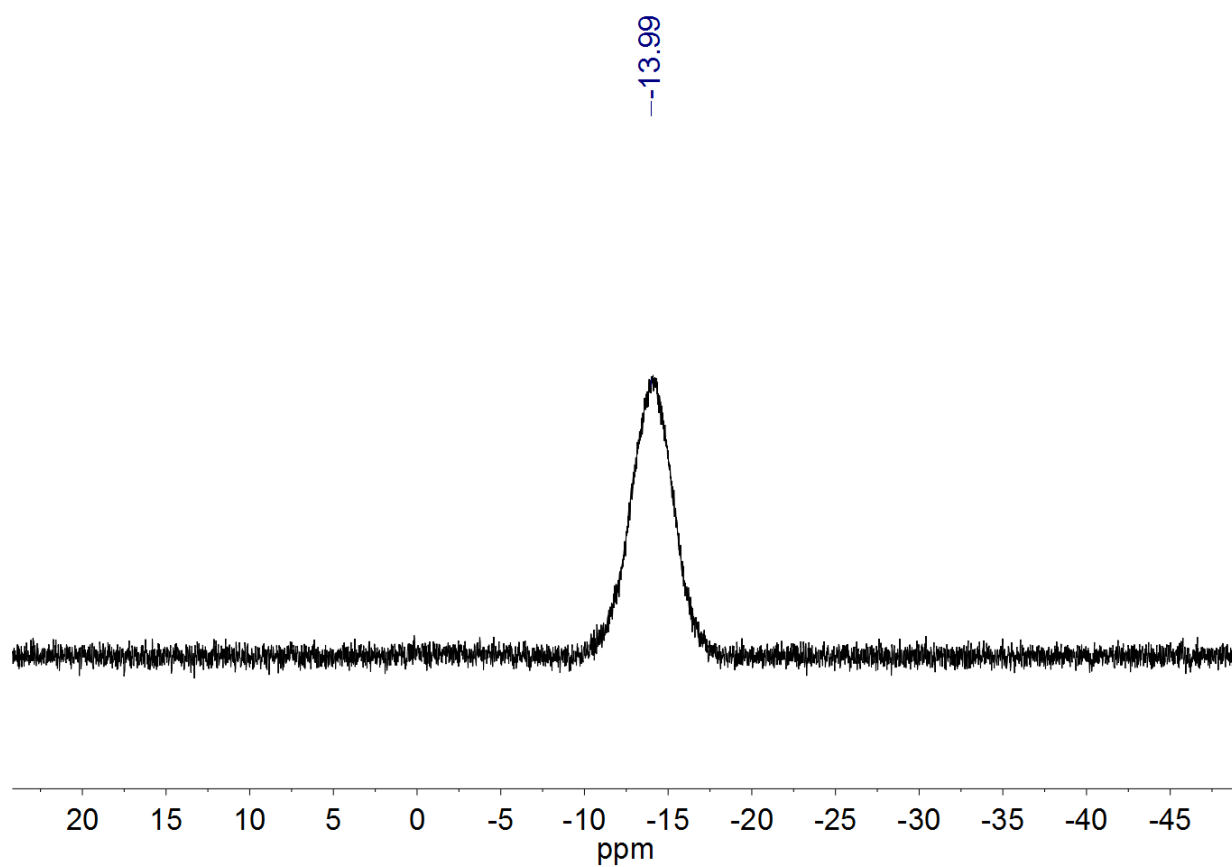

**Fig. S12**  $^{11}\text{B}$  NMR spectrum of compound **7** (128 MHz,  $\text{CDCl}_3$ )

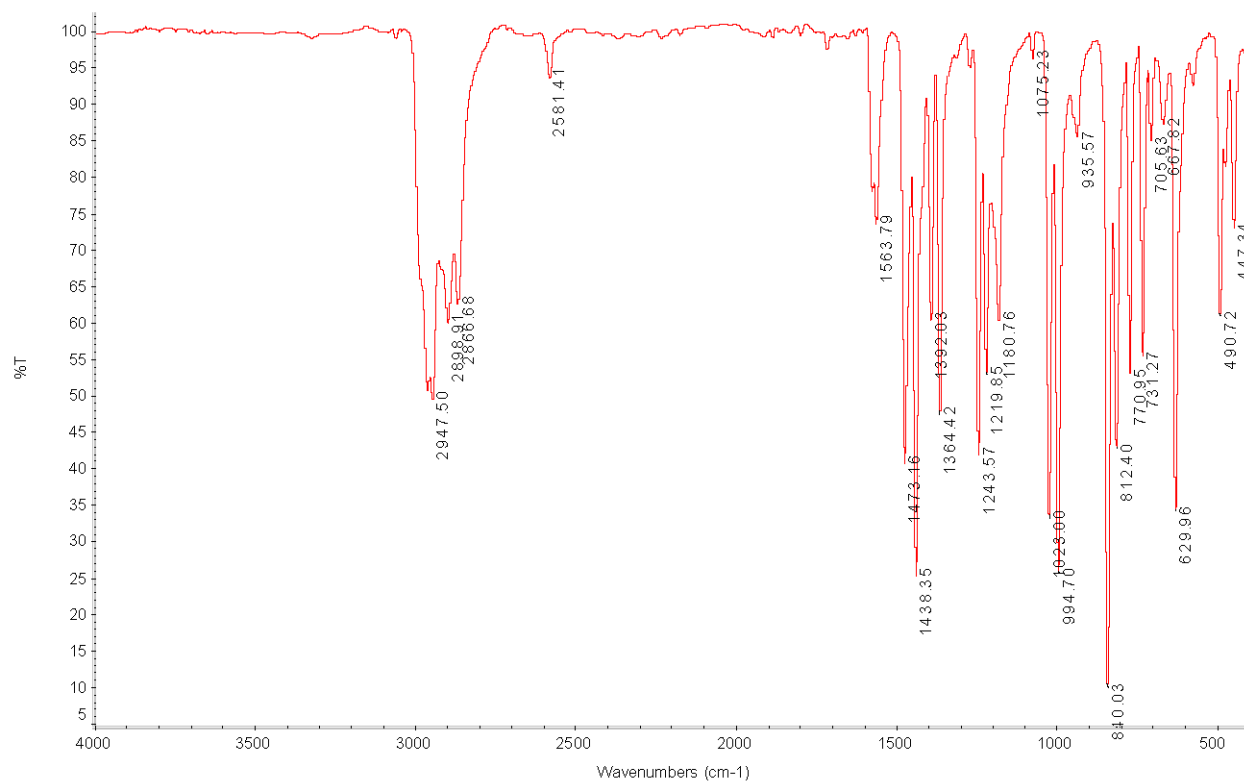

**Fig. S13** FTIR spectra of complex **5** (KBr disc)
